# Supplementary material for: Butyrate promotes oral squamous cell carcinoma cells migration, invasion and epithelial-mesenchymal transition
Source: PeerJ journal article supplement (doi:10.7717/peerj.12991), 2022-02-22
Supplement: Raw_data.zip [file Raw_data.zip]

## Sheet: Sheet1
HSC-4
			one						two						three
group						group						group
0mM	gapdh	17.4066	17.3942	17.2608		0mM	gapdh	16.9278	16.776	16.9468		0mM	gapdh	16.9241	16.9219	16.8727
	E-cadherin	22.9878	23.1184	23.077			E-cadherin	23.1357	23.2311	22.9843			E-cadherin	23.5022	23.2783	23.1482
	Vimentin	31.8165	31.2002	31.2467			Vimentin	28.9867	28.8978	28.8835			Vimentin	29.4098	29.2361	29.2825
	SNAI1	31.7678	31.7793	31.8294			SNAI1	30.626	30.3337	30.3136			SNAI1	31.6472	31.9352	31.721
2.5mM	gapdh	16.6964	16.7904	16.7916		2.5mM	gapdh	16.9717	16.9459	16.9588		2.5mM	gapdh	17.2114	16.961	17.182
	E-cadherin	21.4544	21.3974	21.315			E-cadherin	22.1591	21.7423	21.8507			E-cadherin	22.0332	21.9337	21.8252
	Vimentin	27.7489	27.7272	27.5009			Vimentin	25.9569	25.813	25.785			Vimentin	26.2839	26.1468	26.11
	SNAI1	28.0715	28.6372	28.4826			SNAI1	27.3685	27.5079	27.2878			SNAI1	28.6724	28.2065	28.2356
5mM	gapdh	16.9806	17.024	16.9306		5mM	gapdh	16.5727	16.7091	16.6336		5mM	gapdh	16.9033	16.8875	16.8515
	E-cadherin	21.6469	21.6886	21.5674			E-cadherin	21.6838	21.7855	21.5473			E-cadherin	21.9469	22.0164	22.1013
	Vimentin	27.3641	27.3476	27.4097			Vimentin	25.2521	25.2728	25.1756			Vimentin	25.9283	25.8168	25.876
	SNAI1	27.2915	27.4625	27.489			SNAI1	26.6568	26.8961	26.6249			SNAI1	27.6499	27.87	28.0554
			one						two						three
group						group						group
0mM	gapdh	15.5875	16.1452	16.1771		0mM	gapdh	17.7986	17.4217	17.0591		0mM	gapdh	17.244	16.9413	17.3059
	N-cadherin	25.2311	25.2835	24.9844			N-cadherin	25.9133	26.2187	25.8899			N-cadherin	25.9133	26.2187	25.8899
	Twist	28.6113	28.6248	28.6866			Twist	29.9526	30.0396	30.3133			Twist	29.9526	30.0396	30.3133
	Slug	23.1418	22.9824	23.1701			Slug	23.9207	23.8157	23.9654			Slug	23.9207	23.8157	23.9654
2.5mM	gapdh	16.3067	16.6141	16.5641		2.5mM	gapdh	16.6836	17.2344	17.3221		2.5mM	gapdh	17.544	17.3746	17.2317
	N-cadherin	24.8453	24.6203	24.5787			N-cadherin	25.518	25.3327	25.0035			N-cadherin	25.518	25.3327	25.0035
	Twist	28.1541	28.5899	28.584			Twist	29.9233	29.9118	30.141			Twist	29.9233	29.9118	30.141
	Slug	22.3374	22.1849	22.1579			Slug	22.9605	22.7774	23.0716			Slug	22.9605	22.7774	23.0716
5mM	gapdh	16.0816	16.2804	15.9177		5mM	gapdh	17.3587	17.2643	17.1919		5mM	gapdh	17.4779	17.3853	17.0098
	N-cadherin	24.6669	24.9141	24.91			N-cadherin	25.5636	25.6532	25.2551			N-cadherin	25.5636	25.6532	25.2551
	Twist	28.6708	28.3774	28.1411			Twist	29.7698	29.689	29.1606			Twist	29.7698	29.689	29.1606
	Slug	21.8689	21.8741	22.0742			Slug	22.7453	22.569	22.4892			Slug	22.7453	22.569	22.4892
SCC-9
			one						two
group						group						group			three
0mM	gapdh	18.1807	18.3508	18.5015		0mM	gapdh	18.3725	18.8138	18.1991		0mM	gapdh	17.7742	17.8101	17.8888
	E-cadherin	22.9309	22.9675	22.9597			E-cadherin	22.9283	22.8406	22.7645			E-cadherin	21.4226	21.3842	21.3528
	Vimentin	29.9379	29.51	29.876			Vimentin	29.9381	29.3742	29.5913			Vimentin	29.7345	29.6229	29.7343
	SNAI1	30.9171	30.8322	30.5764			SNAI1	30.8399	30.6429	30.9221			SNAI1	30.6752	30.7728	30.7103
2.5mM	gapdh	18.2239	17.9672	18.1516		2.5mM	gapdh	18.2767	18.1955	18.2361		2.5mM	gapdh	18.1706	17.972	17.8955
	E-cadherin	21.3586	21.5939	21.4414			E-cadherin	21.779	21.6479	21.7134			E-cadherin	21.0493	20.9778	20.9167
	Vimentin	26.3283	26.2606	26.2117			Vimentin	25.9198	25.9772	25.9485			Vimentin	25.8485	25.9701	25.6254
	SNAI1	26.6273	26.6268	26.7505			SNAI1	26.5001	26.5291	26.4389			SNAI1	26.6682	26.3648	26.4526
5mM	gapdh	18.6173	18.4992	18.6201		5mM	gapdh	18.9279	18.8653	18.774		5mM	gapdh	18.3696	18.2616	18.2851
	E-cadherin	21.9339	22.0223	22.1237			E-cadherin	22.1208	22.1376	22.1255			E-cadherin	22.1051	21.5978	21.95
	Vimentin	26.0864	26.0785	26.243			Vimentin	25.5576	25.6397	25.6411			Vimentin	25.7128	25.6016	25.6143
	SNAI1	26.6701	26.6434	26.63			SNAI1	26.465	26.4369	26.4857			SNAI1	26.6478	26.5225	26.5782
			one						two						three
group						group						group
0mM	gapdh	17.9346	18.1854	18.015		0mM	gapdh	20.9978	21.1161	20.4043		0mM	gapdh	22.7057	22.2292	22.1045
	N-cadherin	25.9448	26.2321	25.6923			N-cadherin	25.8768	25.7591	25.7998			N-cadherin	25.5809	25.9209	25.5838
	Twist	30.2641	30.2103	30.1367			Twist	30.1997	30.1129	30.1114			Twist	30.1944	29.9793	30.0419
	Slug	23.8249	23.8892	23.8688			Slug	23.8567	23.658	23.8432			Slug	24.0547	23.9702	23.812
2.5mM	gapdh	18.2555	17.9742	18.3592		2.5mM	gapdh	21.9898	21.8349	21.5824		2.5mM	gapdh	22.6738	22.3714	22.8889
	N-cadherin	25.4761	25.569	25.6286			N-cadherin	25.6329	25.8492	25.7818			N-cadherin	25.3171	25.3728	25.5431
	Twist	29.9826	29.827	30.0666			Twist	30.0147	30.1129	29.8435			Twist	29.9179	29.7532	29.8735
	Slug	23.0573	23.1563	23.1121			Slug	23.164	23.0596	23.0001			Slug	23.1937	23.2917	23.2348
5mM	gapdh	19.1307	19.172	19.21		5mM	gapdh	22.2055	21.8795	21.7179		5mM	gapdh	22.7493	22.9252	22.621
	N-cadherin	26.0833	26.0053	26.2299			N-cadherin	25.9552	25.9939	26.1343			N-cadherin	25.6994	25.6597	25.2866
	Twist	30.3865	30.0389	30.1226			Twist	30.4161	30.0556	30.6956			Twist	30.3203	29.909	30.0137
	Slug	23.1957	22.9942	23.2024			Slug	23.3003	23.0699	23.072			Slug	23.1094	23.1741	23.3716
